# Supplementary material for: PHGDH and LEP serve as prognostic markers associated with B cell and responses to immunotherapy in triple-negative breast cancer
Source: Research Square preprint supplement (doi:10.21203/rs.3.rs-6997049/v1), 2025-07-09
Supplement: Supplementary file 1 [file d9a0fe485a8336efec4ada40.docx]

**
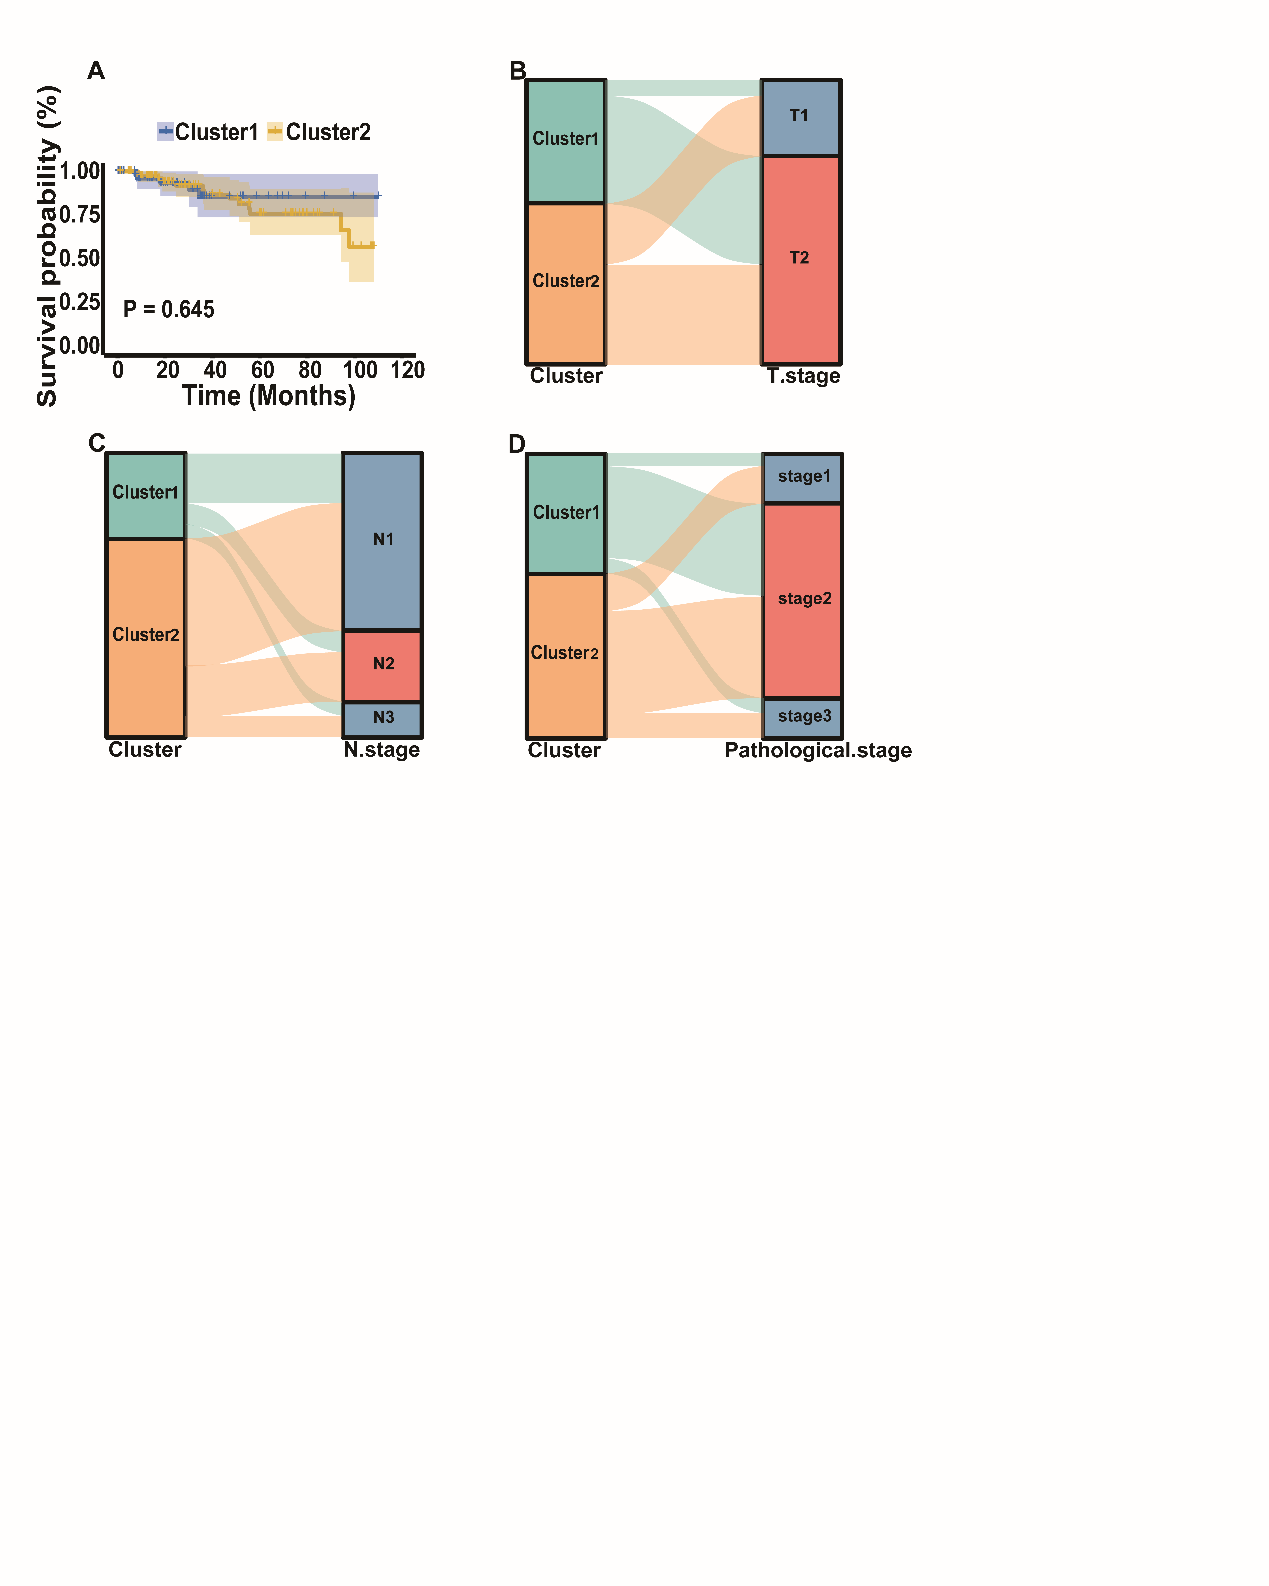
**

**Supplementary FigS1.** **Survival analysis of the two clusters and their association with clinical. (A)** Survival analysis between the two clusters. **(B**-**D)** Alluvial diagram of subtype distributions in clusters with different T stage, N stage and pathological stage.

**
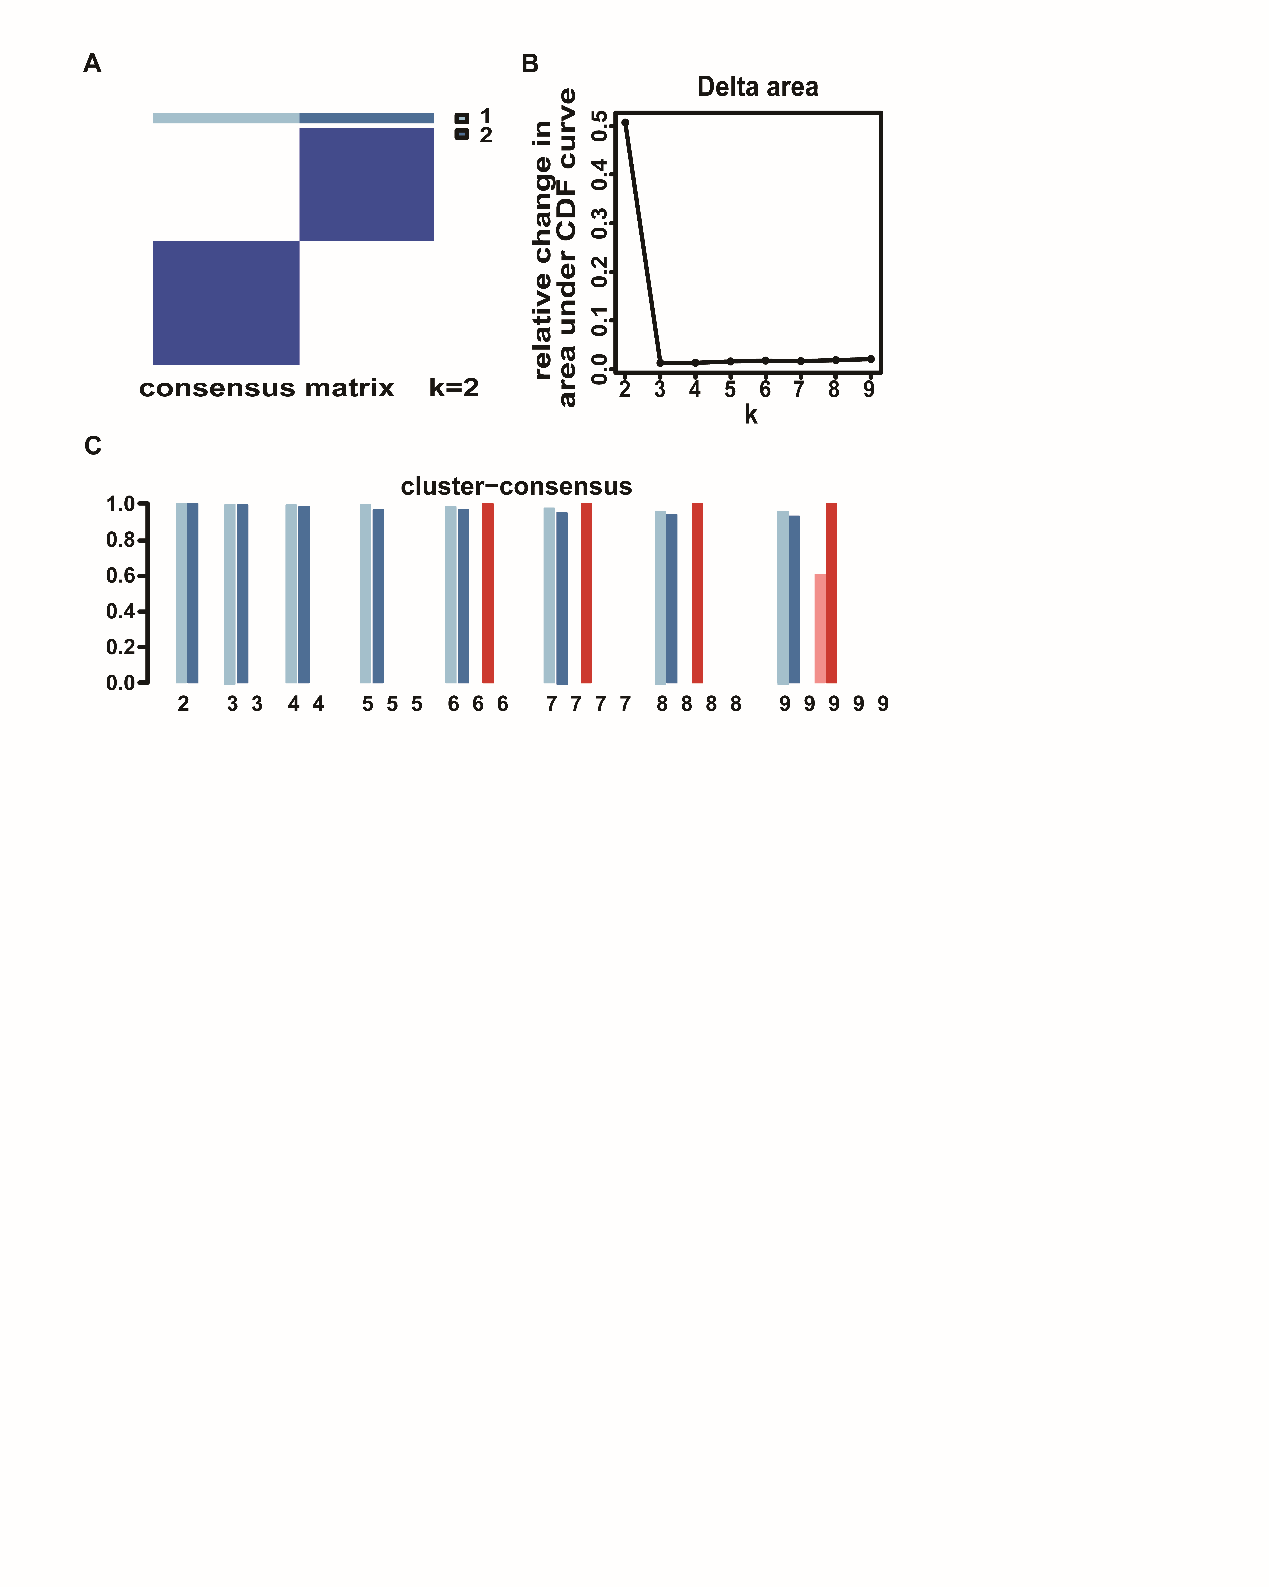
**

**Supplementary FigS2.** **(A)** Heatmap associated with the consensus matrix derived from consensus clustering (k = 2). **(B)** The delta area is used to identify the optimal clustering number. (**C**) Visualization of the consensus matrix (k = 2).
